# Supplementary material for: Concise routes to pyrazolo[1,5-a]pyridin-3-yl pyridazin-3-ones
Source: Royal Society of Chemistry journal article supplement (doi:10.1039/b713638b), 2007-11-22

## Supplementary Information

### Concise Routes to Pyrazolo[1,5-*a*]pyridin-3-yl Pyridazin-3-ones

Karen A. Johnston, Robert W. Allcock, Zhong Jiang, Ian D. Collier, Haakon Blakli, Georgina M. Rosair, Patrick D. Bailey, Keith M. Morgan, Yasushi Kohno, and David R. Adams

#### *N*-Aminopyridinium Mesitylenesulfonate

*N*-Aminopyridinium mesitylenesulfonate was prepared by adaptation of the procedure reported by Tamura *et al* through amination of pyridine with *O*-mesitylenesulfonylhydroxylamine (MSH).<sup>1</sup> **CAUTION: MSH is explosively unstable as a dry solid.** To minimise the explosion hazard we isolated MSH as a water-wet solid. The solid was immediately dissolved in dichloromethane and then dried and used in solution form for subsequent reactions. Quantification was possible by evaporating an aliquot of MSH solution and then weighing the resulting dry powder (100-200 mg quantities).

#### Ethyl *N*-mesitylsulfonyloxyethanimidate (MSA)

To an ice-cooled solution of ethyl *N*-hydroxyacetimidate (7.45 g, 72.2 mmol) in anhydrous DMF (30 mL) was added triethylamine (11.0 mL, 78.9 mmol) followed after 15 min by mesitylenesulfonyl chloride (15.9 g, 72.7 mmol) in increments over 15 min. The solution was allowed to attain room temperature over 1 h. The resulting slurry was poured into ice-cold water (200 mL) and the precipitate collected by filtration. The filter cake was washed with cold water (200 mL) and dried *in vacuo* to afford the *title compound* (18.5 g, 64.8 mmol; 90%) as a colourless powder:  $\nu_{\max}(\text{KBr})/\text{cm}^{-1}$  2982, 2941, 1636, 1605, 1383, 1318, 1195, 1101, 1055, 963, 851, 814, 668;  $\delta_{\text{H}}$  (200 MHz; CDCl<sub>3</sub>) 1.18 (3 H, t, *J* 7.1, CH<sub>3</sub>CH<sub>2</sub>O), 2.04 (3 H, s, C(CH<sub>3</sub>)OEt), 2.31 (3 H, s, 4'-CH<sub>3</sub>), 2.64 (6 H, s, 2'-CH<sub>3</sub> & 6'-CH<sub>3</sub>), 3.90 (2 H, q, *J* 7.1, CH<sub>3</sub>CH<sub>2</sub>O), 6.96 (2 H, s, H-3' & H-5');  $\delta_{\text{C}}$  (50 MHz; CDCl<sub>3</sub>)<sup>2</sup> 14.1 (CH<sub>3</sub>CH<sub>2</sub>O), 15.0 (CH<sub>3</sub>C=N), 21.2 (4'-CH<sub>3</sub>), 23.0 (2'-CH<sub>3</sub> & 6'-CH<sub>3</sub>), 63.7 (CH<sub>3</sub>CH<sub>2</sub>O), 130.5 (C-4'), 131.6 (CH-3' & CH-5'), 140.8 (C-2' & C-6'), 143.4 (C-1'), 169.3 (C=N); (Found: C, 54.80; H, 6.79; N, 4.92. Calculated for C<sub>13</sub>H<sub>19</sub>NO<sub>4</sub>S: C, 54.72; H, 6.71; N, 4.91%).

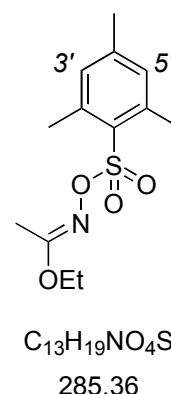

- (1) (a) Y. Tamura, J. Minamikawa and M. Ikeda, *Synthesis*, **1977**, 1; (b) Y. Tamura, J. Minamikawa, K. Sumoto, S. Fujii and M. Ikeda, *J. Org. Chem.*, **1973**, 38, 1239; (c) Y. Tamura, J. Minamikawa, Y. Miki, S. Matsugashita and M. Ikeda, *Tetrahedron Lett.*, **1972**, 13, 4133.
- (2) <sup>13</sup>C NMR assignments for compound MSA were supported by the acquisition of an HSQC spectrum.

### *O*-Mesitylenesulfonylhydroxylamine (MSH)

An ice-cooled, briskly stirred solution of ethyl *N*-mesitylsulfonyloxyethanimidate (27.3 g, 95.5 mmol) in 1,4-dioxane (55 mL) was treated dropwise over 8 min with perchloric acid (70% w/w; 48.8 g, 340 mmol). A viscous paste was formed shortly after completing the perchloric acid addition. Further dioxane (55 mL) was added to assist stirring and the mixture maintained in the ice bath for 1 h. The resulting slurry was poured into ice-cold water (600 mL) and the precipitate collected by filtration, washing with ice-cold water (500 mL). The wet filter cake was then dissolved in dichloromethane (250 mL) and the resulting solution washed with brine (100 mL), dried by filtration through a plug of MgSO<sub>4</sub> and used directly for preparation of the *N*-aminopyridinium salt. Evaporation of a small sample of MSH solution to dryness [**CAUTION**] permitted NMR analysis:  $\delta_{\text{H}}$  (200 MHz; CDCl<sub>3</sub>) 2.30 (3 H, s, 4-CH<sub>3</sub>), 2.60 (6 H, s, 2-CH<sub>3</sub> & 6-CH<sub>3</sub>), 6.78 (2 H, br s, NH<sub>2</sub>), 6.96 (2 H, s, H-3 & H-5).

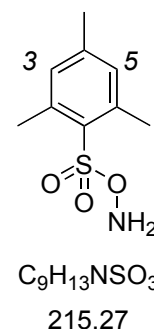

### *N*-Aminopyridinium Mesitylenesulfonate<sup>1</sup>

To a solution of MSH (prepared as above from MSA, 95.5 mmol) in CH<sub>2</sub>Cl<sub>2</sub> (250 mL) was added pyridine (10.0 mL, 124 mmol). The mixture was stirred for 18 h at room temperature during which time the *N*-aminopyridinium salt crystallised directly from the reaction medium. The resulting slurry was diluted with hexane (250 mL); the solid was collected by filtration, washing well with Et<sub>2</sub>O, and dried *in vacuo* over P<sub>2</sub>O<sub>5</sub> to afford the *title salt* (23.0 g, 78.3 mmol; 82% over the 2 steps from MSA) as a colourless powder: mp 118-120 °C (from CH<sub>2</sub>Cl<sub>2</sub>-hexane);  $\nu_{\text{max}}$ (KBr)/cm<sup>-1</sup> 3283, 3129, 3074, 1491, 1210, 1182, 1012, 846, 772, 682;  $\delta_{\text{H}}$  (200 MHz; DMSO-*d*<sub>6</sub>) 2.16 (3 H, s, 4'-CH<sub>3</sub>), 2.49 (6 H, s, 2'-CH<sub>3</sub> & 6'-CH<sub>3</sub>), 6.75 (2 H, s, H-3' & H-5'), 7.95-8.04 (2 H, m, H-3 & H-5), 8.21-8.29 (1 H, m, H-4), 8.54 (2 H, br s, NH<sub>2</sub>), 8.75-8.81 (2 H, m, H-2 & H-6);  $\delta_{\text{C}}$  (50 MHz; DMSO-*d*<sub>6</sub>)<sup>3</sup> 20.4 (4'-CH<sub>3</sub>), 22.8 (2'-CH<sub>3</sub> & 6'-CH<sub>3</sub>), 128.3 (CH-3 & CH-5), 130.0 (CH-3' & CH-5'), 136.0 (C-2' & C-6'), 136.6 (C), 138.3 (CH-2 & CH-6), 139.7 (4-CH), 142.5 (C); (Found C, 56.99; H, 6.15; N, 9.45. Calculated for C<sub>14</sub>H<sub>18</sub>N<sub>2</sub>O<sub>3</sub>S: C, 57.12; H, 6.16; N, 9.52%).

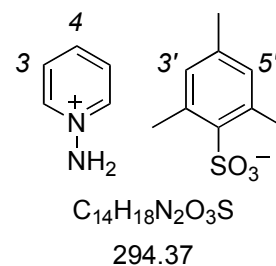

(3) <sup>13</sup>C NMR assignments for *N*-aminopyridinium mesitylenesulfonate were supported by the acquisition of an HSQC spectrum.

## 6-Chloropyridazin-3(2H)-one (23)<sup>4</sup>

3,6-Dichloropyridazine (12.9 g, 86.4 mmol) was boiled in glacial AcOH (200 mL) for 3 h. The mixture was then concentrated by distillation at atmospheric pressure. After cooling, the residue was dissolved in H<sub>2</sub>O (50 mL) and the mixture adjusted to pH 7 by addition of saturated NaHCO<sub>3</sub> solution. The resulting precipitate was collected by filtration, washed with water and dried *in vacuo* over P<sub>2</sub>O<sub>5</sub> to afford 6-chloro-2H-pyridazin-3-one (10.7 g, 82.0 mmol; 95%) as a colourless powder: mp 142-143 °C;  $\nu_{\max}(\text{KBr})/\text{cm}^{-1}$  3208, 3055, 2918, 2849, 1673, 1582, 1545, 1289, 1143, 1114, 1005, 839, 673;  $\delta_{\text{H}}$  (200 MHz; DMSO-*d*<sub>6</sub>) 6.97 (1 H, d, *J* 9.7), 7.51 (1 H, d, *J* 10.0);  $\delta_{\text{C}}$  (50 MHz; DMSO-*d*<sub>6</sub>) 132.6 (CH), 134.8 (CH), 137.5 (C-6), 159.8 (C-3); *m/z* (EI) 130 (<sup>35</sup>Cl; 96%, M<sup>+</sup>), 102 (<sup>35</sup>Cl; 81%, M<sup>+</sup>-N<sub>2</sub>), 95 (5%, M<sup>+</sup>-Cl); (Found: C, 36.68; H, 2.26; N, 21.32. Calculated for C<sub>4</sub>H<sub>3</sub>ClN<sub>2</sub>O: C, 36.81; H, 2.32; N, 21.46%).

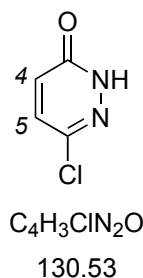

## 2-Benzyl-6-chloropyridazin-3(2H)-one (24)<sup>5</sup>

To a stirred solution of 6-chloropyridazin-3(2H)-one (10.5 g, 80.4 mmol) in anhydrous DMF (150 mL) under argon was added Cs<sub>2</sub>CO<sub>3</sub> (45.8 g, 141 mmol) followed, after 30 minutes, by benzyl bromide (12.0 mL, 101 mmol). The heterogeneous mixture was stirred for 2.5 h at room temperature; it was then filtered and the filtrate concentrated *in vacuo* to afford an orange solid. This residue was dissolved in EtOAc (100 mL); the resulting solution washed with H<sub>2</sub>O (30 mL) followed by brine (2 x 30 mL), dried (MgSO<sub>4</sub>) and the solvent evaporated to yield a yellow solid. Recrystallisation of this material from EtOAc-petroleum 60-80 °C (1:9) yielded the *title compound* (11.7 g, 52.9 mmol; total yield 66%): mp 97-98 °C (EtOAc-petroleum);  $\nu_{\max}(\text{KBr})/\text{cm}^{-1}$  3031, 2962, 1659, 1576, 1294, 1130, 1061, 901, 840, 749, 699;  $\delta_{\text{H}}$  (200 MHz; CDCl<sub>3</sub>) 5.25 (2 H, s, CH<sub>2</sub>Ph), 6.90 (1 H, d, *J* 9.7), 7.15 (1 H, d, *J* 9.7), 7.28-7.47 (5 H, m, Ph);  $\delta_{\text{C}}$  (50 MHz; CDCl<sub>3</sub>) 55.6 (CH<sub>2</sub>Ph), 128.3 (CH), 128.8 (2 x Ph CH), 129.0 (2 x Ph CH), 132.4 (CH), 133.8 (CH), 135.6 (C), 137.6 (C), 158.9 (C-3); *m/z* (EI) 220 (<sup>35</sup>Cl; 44%, M<sup>+</sup>), 185 (66%, M<sup>+</sup>-Cl), 91

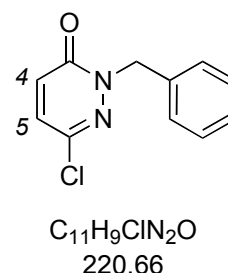

- (4) (a) H. Feuer and H. Rubinstein, *J. Org. Chem.*, **1959**, *24*, 811; (b) W. J. Coates and A. McKillop, *Heterocycles*, **1993**, *35*, 1313; (c) A. Katrusiak and A. Katrusiak, *J. Mol. Struct.*, **2003**, *647*, 203; (d) F. Yoneda and Y. Nitta, *Chem. Pharm. Bull.*, 1963, **11**, 269.
- (5) F. Yoneda and Y. Nitta, *Chem. Pharm. Bull.*, 1963, **11**, 737.

(100%, C<sub>7</sub>H<sub>7</sub><sup>+</sup>); (Found: C, 59.88; H, 4.10; N, 12.60. Calculated for C<sub>11</sub>H<sub>9</sub>ClN<sub>2</sub>O: C, 59.88; H, 4.11; N, 12.70%).

### 1-Phenyl-1,2-dihydropyridazine-3,6-dione (26)<sup>6</sup>

A mixture of maleic anhydride (25.1 g, 256 mmol) and phenylhydrazine (27.5 mL, 280 mmol) was boiled in glacial AcOH (100 mL) for 3 h. On cooling, a yellow precipitate formed; this was collected by filtration and recrystallised from EtOH to afford the *title compound* (22.4 g, 118 mmol; 47%) as a colourless crystalline solid: mp 273-274 °C;  $\nu_{\max}(\text{KBr})/\text{cm}^{-1}$  3000, 3058, 2362, 1661 (CO), 1492, 1452, 1250, 838, 682;  $\delta_{\text{H}}$  (200 MHz; DMSO-*d*<sub>6</sub>) 7.01 (1 H, d, *J* 9.8), 7.17

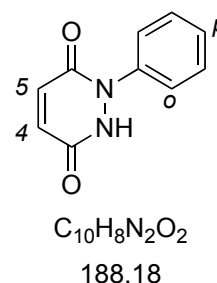

(1 H, d, *J* 9.8), 7.31-7.58 (5 H, complex overlapping m, Ph), 11.35 (1 H, br s, NH);  $\delta_{\text{C}}$  (50 MHz; DMSO-*d*<sub>6</sub>) 125.6 (2 x Ph CH), 127.5 (CH), 127.7 (CH), 128.5 (2 x Ph CH), 134.0 (CH), 141.5 (Ph C), 152.9 (C), 157.8 (C); *m/z* (ESI) 188 (12%, M<sup>+</sup>), 187 (38%, M<sup>+</sup> - H), 375 (100%, 2M-1); (Found: C, 63.72; H, 4.20; N, 14.68. Calculated for C<sub>10</sub>H<sub>8</sub>N<sub>2</sub>O<sub>2</sub>: C, 63.82; H, 4.28; N, 14.89%).

### 6-Chloro-2-phenylpyridazin-3(2H)-one (27)<sup>7</sup>

1-Phenyl-1,2-dihydropyridazine-3,6-dione (**18**; 2.04 g, 10.8 mmol) was boiled in POCl<sub>3</sub> (55 mL) for 2 h. After this period, most of the POCl<sub>3</sub> was removed by distillation. The resulting brown residue was dissolved in EtOAc (50 mL) and washed with saturated NaHCO<sub>3</sub> solution (6 x 20 mL) until cessation of effervescence. The organic layer was further washed with brine (3 x 20 mL), dried over MgSO<sub>4</sub> and evaporated to yield a pale yellow solid. The latter was

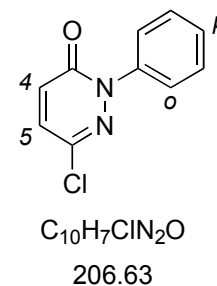

recrystallised from light petroleum to afford the *title compound* (1.71 g, 8.28 mmol; 77%) as a colourless crystalline solid: mp 115-117 °C (from light petroleum);  $\nu_{\max}(\text{thin film})/\text{cm}^{-1}$  3018, 1674, 1587, 1216, 755, 692;  $\delta_{\text{H}}$  (200 MHz; CDCl<sub>3</sub>) 7.04 (1 H, d, *J* 9.8), 7.25 (1 H, d, *J* 9.8), 7.35-7.62 (5 H, complex overlapping m, Ph);  $\delta_{\text{C}}$  (50 MHz; CDCl<sub>3</sub>) 125.3 (2 x Ph CH), 128.8 (CH), 129.0 (2 x Ph CH), 133.4 (CH), 133.8 (CH), 138.3 (C), 140.8 (C), 158.6 (C-3); *m/z* (ESI) 206 (<sup>35</sup>Cl; 12%, M<sup>+</sup>), 205 (<sup>35</sup>Cl; 25%, M<sup>+</sup> - H), 411 (<sup>35</sup>Cl; 68%, 2M-1); (Found: C, 58.24; H, 3.45; N, 13.47. Calculated for C<sub>10</sub>H<sub>7</sub>ClN<sub>2</sub>O: C, 58.13; H, 3.41; N, 13.56%).

(6) W. H. Pirkle and P. L. Gravel, *J. Org. Chem.*, **1977**, *42*, 1367.

(7) (a) J. Druey, A. Huni, D. H. Rinigier and A. Staehelin, *Helv. Chim. Acta.*, **1954**, *37*, 510; (b) V. P. Feshin, S. A. Giller, L. Y. Avota, M. G. Voronkov, *Chem. Heterocycl. Compd. (English Translation)*, **1976**, *12*, 334.

## 2-Benzyl-2,3-dihydrophthalazine-1,4-dione (31)<sup>8</sup>

Phthalic anhydride (4.19 g, 28.3 mmol) and benzylhydrazine dihydrogen chloride (5.09 g, 28.3 mmol) were boiled in glacial AcOH (100 mL) for 4 h. The mixture was evaporated and the resulting residue dissolved in EtOAc (20 mL). The solution was then washed with saturated NaHCO<sub>3</sub> solution until all residual AcOH was removed. The organic layer was further washed with brine (3 x 15 mL) and then dried (Na<sub>2</sub>SO<sub>4</sub>) and

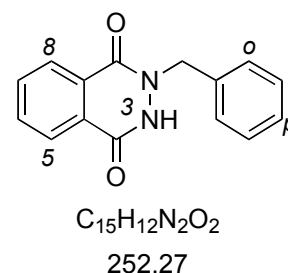

evaporated to give a white solid. The latter was recrystallised from MeOH/light petroleum to afford the *title compound* (4.73 g, 18.7 mmol; 66%) as a colourless powder: mp 210-211 °C (from MeOH/light petroleum);  $\nu_{\max}(\text{KBr})/\text{cm}^{-1}$  3100, 1634, 1595, 1289, 1169, 1097, 792, 744, 709, 691;  $\delta_{\text{H}}$  (200 MHz; DMSO-*d*<sub>6</sub>) 5.19 (2 H, s, CH<sub>2</sub>Ph), 7.22-7.34 (5 H, complex overlapping m, Ph), 7.85-7.99 (3 H, complex overlapping m, 3 x CH), 8.23-8.29 (1 H, complex m, CH), 11.75 (1 H, br s, NH);  $\delta_{\text{C}}$  (50 MHz; DMSO-*d*<sub>6</sub>) 52.6 (CH<sub>2</sub>Ph), 124.2 (CH), 124.7 (C), 126.6 (CH), 127.3 (CH), 127.5 (2 x CH), 128.5 (2 x CH), 128.8 (C), 132.4 (CH), 133.3 (CH), 137.6 (C), 150.4 (C), 157.5 (C); *m/z* (EI) 252 (26%, M<sup>+</sup>), 148 (68%, M<sup>+</sup> - NBn), 91 (93%, C<sub>7</sub>H<sub>7</sub><sup>+</sup>), 77 (27%, C<sub>6</sub>H<sub>5</sub><sup>+</sup>); (Found: C, 71.37; H, 4.80; N, 11.11. Calculated for C<sub>15</sub>H<sub>12</sub>N<sub>2</sub>O<sub>2</sub>: C, 71.42; H, 4.79; N, 11.10%).

(8) (a) R. Wegler, *J. Prakt. Chem.*, **1937**, 148, 135; (b) N. P. Buu-Hoi, H. Le Bihan and F. Binon, *Recl. Trav. Chim. Pays-Bas*, **1951**, 70, 1099.

1-Methyl-2-(3-methylbut-1-ynyl)pyridinium iodide (37);  $^1\text{H}$  spectrum at 200 MHz in  $\text{CDCl}_3$

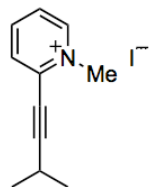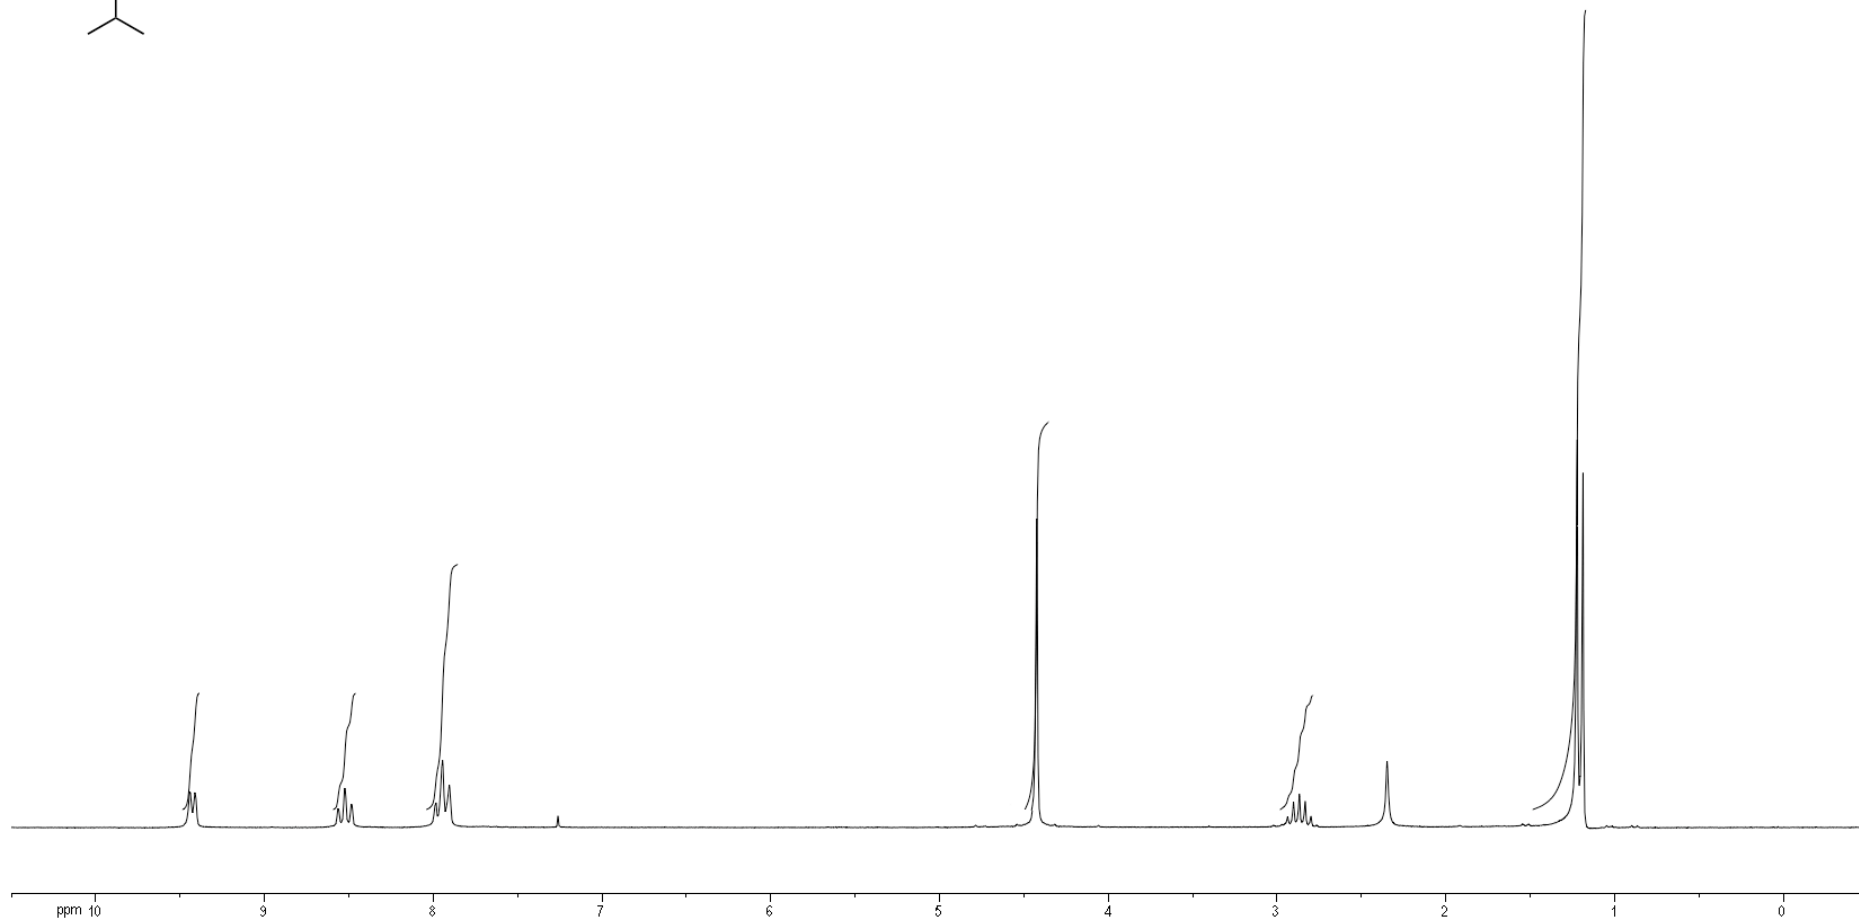

2-(2-Isopropylpyrazolo[1,5-*a*]pyridin-3-yl)-1-methylpyridinium iodide (38);  $^1\text{H}$  spectrum at 400 MHz in  $\text{CDCl}_3$  /  $\text{DMSO-}d_6$

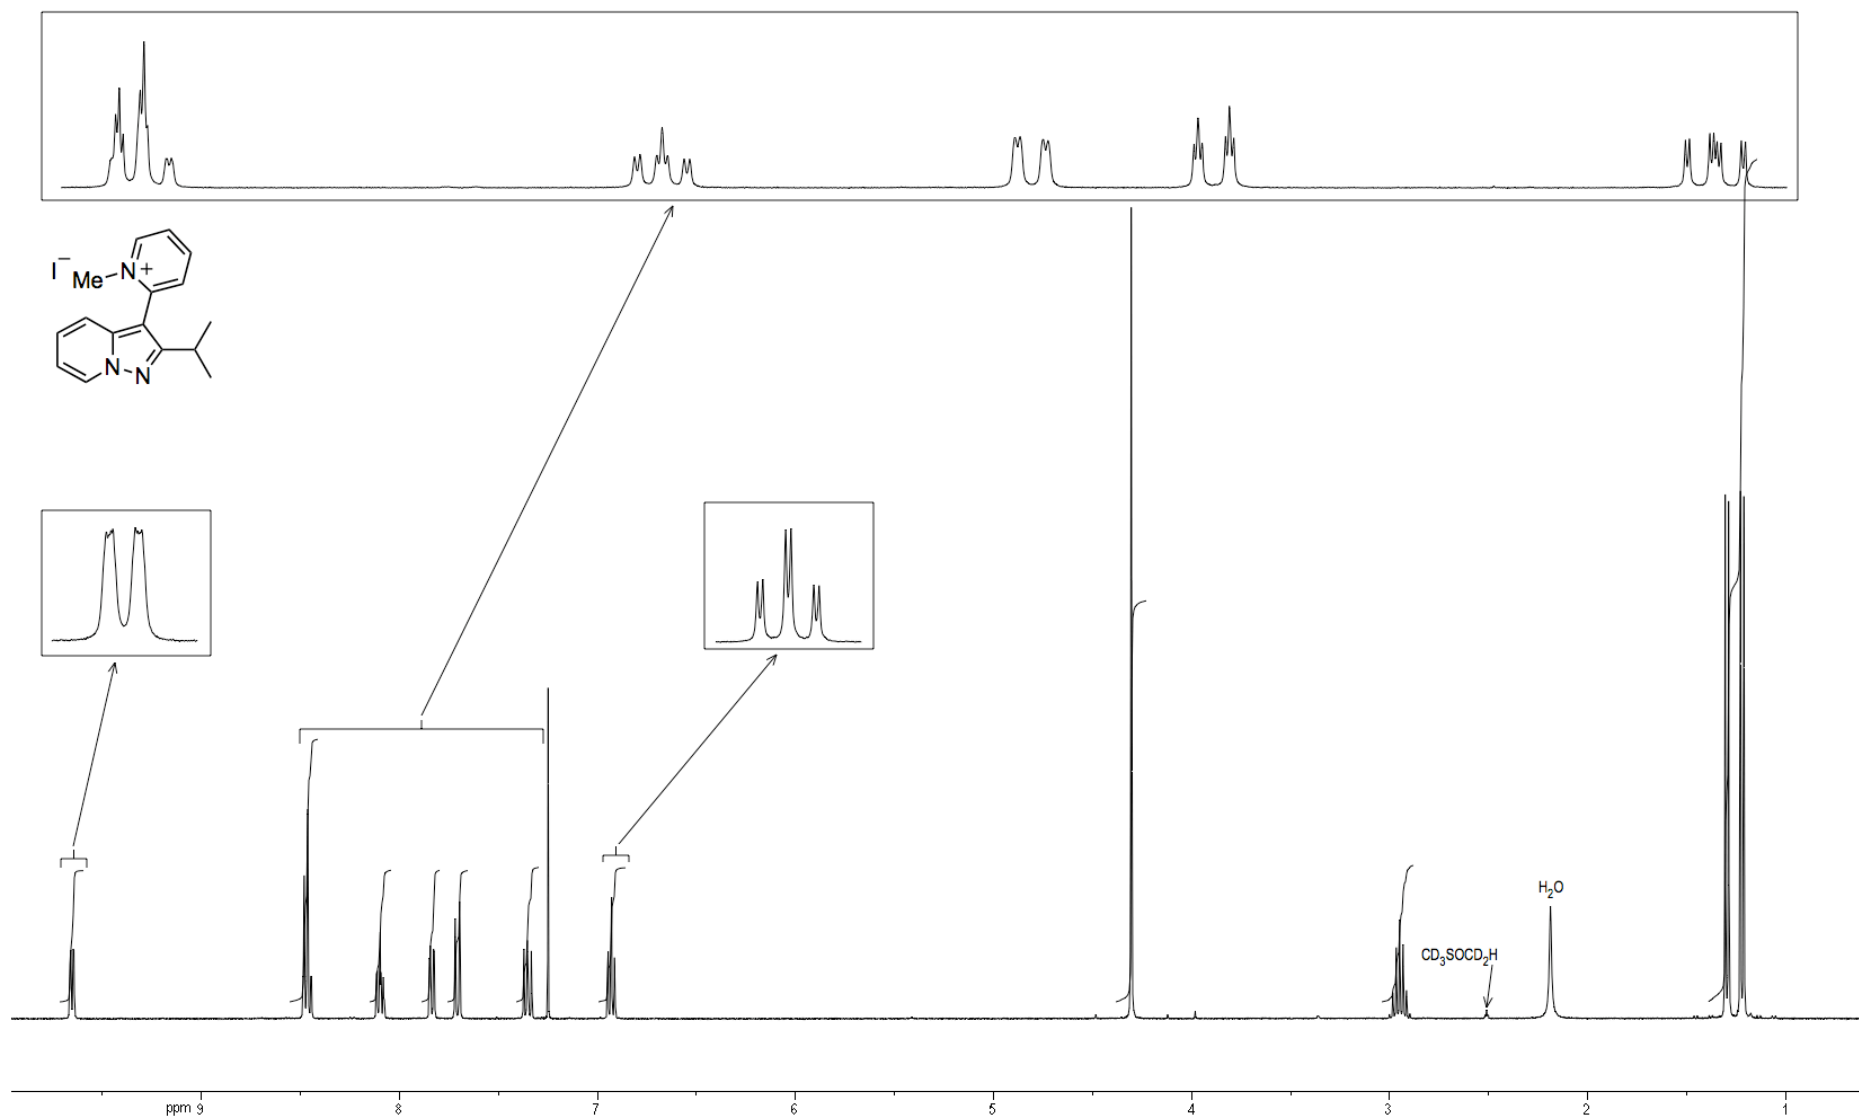

Supplement: b713638b.pdf [file b713638b.pdf]
